# Supplementary material for: Relationship Between Air Pollution and the Concentration of Nitric Oxide in the Exhaled Air (FeNO) in 8–9-Year-Old School Children in Krakow
Source: MDPI journal article supplement (doi:10.3390/ijerph18136690), 2021-06-22
Supplement: s1 [file s1]

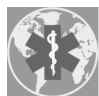

Supplementary Materials

# Relationship between Air Pollution and the Concentration of Nitric Oxide in the Exhaled Air (FeNO) in 8-9-Year-Old School Children in KRAKOW

Marta Czubaj-Kowal, Ryszard Kurzawa, Henryk Mazurek, Michał Sokołowski, Teresa Friediger, Maciej Polak and Grzegorz Józef Nowicki

**Table S1.** Relationship between FeNO and air pollution in the study group after adjustment for age and sex.

| FeNO                                                       | Stage I<br>(autumn-winter period): |       |         | Stage II<br>(springer-summer period): |       |         |
|------------------------------------------------------------|------------------------------------|-------|---------|---------------------------------------|-------|---------|
|                                                            | b                                  | SE    | p       | b                                     | SE    | p       |
| The day of measurement:                                    |                                    |       |         |                                       |       |         |
| NO [ $\mu\text{g}/\text{m}^3$ ]                            | 0.047                              | 0.015 | 0.001   | 0.028                                 | 0.015 | 0.048   |
| CO8h [ $\mu\text{g}/\text{m}^3$ ]                          | 0.119                              | 0.017 | < 0.001 | 0.073                                 | 0.017 | < 0.001 |
| C <sub>6</sub> H <sub>6</sub> [ $\mu\text{g}/\text{m}^3$ ] | 0.109                              | 0.019 | < 0.001 | 0.011                                 | 0.015 | 0.45    |
| PM <sub>10</sub> [ $\mu\text{g}/\text{m}^3$ ]              | 0.089                              | 0.015 | < 0.001 | 0.025                                 | 0.015 | 0.08    |
| PM <sub>2.5</sub> [ $\mu\text{g}/\text{m}^3$ ]             | 0.090                              | 0.015 | < 0.001 | 0.036                                 | 0.015 | 0.01    |
| The median value from the week before:                     |                                    |       |         |                                       |       |         |
| NO [ $\mu\text{g}/\text{m}^3$ ]                            | 0.028                              | 0.014 | 0.049   | 0.029                                 | 0.013 | 0.04    |
| CO8h [ $\mu\text{g}/\text{m}^3$ ]                          | 0.051                              | 0.017 | 0.003   | 0.033                                 | 0.016 | 0.04    |
| C <sub>6</sub> H <sub>6</sub> [ $\mu\text{g}/\text{m}^3$ ] | 0.042                              | 0.018 | 0.02    | 0.025                                 | 0.015 | 0.1     |
| PM <sub>10</sub> [ $\mu\text{g}/\text{m}^3$ ]              | 0.043                              | 0.015 | 0.003   | 0.001                                 | 0.015 | 0.094   |
| PM <sub>2.5</sub> [ $\mu\text{g}/\text{m}^3$ ]             | 0.040                              | 0.015 | < 0.01  | 0.009                                 | 0.015 | 0.52    |

b: standardized beta coefficient; SE: standard error
